# Supplementary material for: Fecal Volatile Metabolomics Predict Gram-Negative Late-Onset Sepsis in Preterm Infants: A Nationwide Case-Control Study
Source: MDPI journal article supplement (doi:10.3390/microorganisms11030572), 2023-02-24
Supplement: s1 [file s1]

## Supplementary Information

### Supplementary Tables (S1–S4)

**Table S1.** Microbiology of blood cultures.

|                                                                   | GC-IMS (n=121)<br>N (%) | GC-TOF-MS (n=34)<br>N (%) |
|-------------------------------------------------------------------|-------------------------|---------------------------|
| <b>Gram-negative bacteria</b>                                     | <b>31 (25.6)</b>        | <b>15 (44.1)</b>          |
| <i>Enterobacter aerogenes</i>                                     | 2                       | 2                         |
| <i>Enterobacter cloacae</i>                                       | 3                       | 2                         |
| <i>Escherichia coli</i>                                           | 18                      | 8                         |
| <i>Klebsiella oxytoca</i>                                         | 1                       | 1                         |
| <i>Klebsiella pneumoniae</i>                                      | 4                       | 2                         |
| <i>Pseudomonas aeruginosa</i>                                     | 1                       | 0                         |
| <i>Serratia marcescens</i>                                        | 2                       | 0                         |
| <b>Gram-positive bacteria (excl. CoNS)</b>                        | <b>23 (19)</b>          | <b>9 (26.5)</b>           |
| <i>Streptococcus agalactiae</i>                                   | 3                       | 2                         |
| <i>Staphylococcus aureus</i>                                      | 16                      | 7                         |
| <i>Enterococcus faecalis</i>                                      | 4                       | 0                         |
| <b>Coagulase negative <i>Staphylococci</i></b>                    | <b>57 (47.1)</b>        | <b>9 (26.5)</b>           |
| <i>Staphylococcus capitis</i>                                     | 8                       | 3                         |
| <i>Staphylococcus caprae</i>                                      | 1                       | 0                         |
| <i>Staphylococcus epidermidis</i>                                 | 41                      | 4                         |
| <i>Staphylococcus haemolyticus</i>                                | 5                       | 2                         |
| <i>Staphylococcus hominis</i>                                     | 2                       | 0                         |
| <b>Multiple bacteria</b>                                          | <b>8 (6.6)</b>          | <b>1 (2.9)</b>            |
| <i>Staphylococcus aureus</i> + <i>Citrobacter freundii</i>        | 1                       | 1                         |
| <i>Staphylococcus epidermidis</i> + <i>Staphylococcus capitis</i> | 3                       | 0                         |
| <i>Staphylococcus epidermidis</i> + <i>Bacillus cereus</i>        | 1                       | 0                         |
| <i>Staphylococcus epidermidis</i> + <i>Staphylococcus hominis</i> | 2                       | 0                         |
| <i>Escherichia coli</i> + <i>Enterococcus faecalis</i>            | 1                       | 0                         |
| <b>Fungi</b>                                                      | <b>2 (1.7)</b>          | <b>0 (0)</b>              |
| <i>Candida albicans</i>                                           | 2                       | 0                         |

Abbreviations: CoNS, coagulase negative *Staphylococci*; GC-TOF-MS, gas chromatography – time of flight/mass spectrometry; GC-IMS, gas chromatography – ion mobility spectrometry.

**Table S2.** Performance characteristics of GC-IMS as analyzed by random forest classification.

| Subgroup                                                                        | Number of<br>Samples |         | <i>p</i> -value | AUC<br>(± 95% CI)        |
|---------------------------------------------------------------------------------|----------------------|---------|-----------------|--------------------------|
|                                                                                 | Case                 | Control |                 |                          |
| All categories of late-onset sepsis                                             |                      |         |                 |                          |
| 3 days before diagnosis (t <sub>-3</sub> )                                      | 82                   | 77      | 0.032           | 0.60 (0.53-0.67)         |
| 2 days before diagnosis (t <sub>-2</sub> )                                      | 79                   | 100     | 0.0001          | 0.71 (0.64-0.77)         |
| 1 day before diagnosis (t <sub>-1</sub> )                                       | 89                   | 101     | 0.019           | 0.60 (0.53-0.67)         |
| Combined time points t <sub>-1-(-3)</sub>                                       | 250                  | 278     | 0.0001          | 0.68 (0.65-0.72)         |
| 1. Gram-negative late-onset sepsis                                              |                      |         |                 |                          |
| 3 days before diagnosis (t <sub>-3</sub> )                                      | 24                   | 20      | 0.0001          | <b>0.83 (0.72-0.93)*</b> |
| 2 days before diagnosis (t <sub>-2</sub> )                                      | 23                   | 29      | 0.008           | 0.72 (0.58-0.84)         |
| 1 day before diagnosis (t <sub>-1</sub> )                                       | 25                   | 26      | 0.147           | 0.62 (0.48-0.75)         |
| Combined time points t <sub>-1-(-3)</sub>                                       | 72                   | 75      | 0.0001          | <b>0.76 (0.70-0.83)*</b> |
| a. E. coli late-onset sepsis                                                    |                      |         |                 |                          |
| 3 days before diagnosis (t <sub>-3</sub> )                                      | 12                   | 9       | 0.267           | <b>0.77 (0.57-1.00)*</b> |
| 2 days before diagnosis (t <sub>-2</sub> )                                      | 12                   | 14      | 0.001           | <b>0.88 (0.74-1.00)*</b> |
| 1 day before diagnosis (t <sub>-1</sub> )                                       | 14                   | 13      | 0.109           | 0.68 (0.49-0.86)         |
| Combined time points t <sub>-1-(-3)</sub>                                       | 38                   | 36      | 0.056           | 0.63 (0.51-0.74)         |
| 2. Gram-positive late-onset sepsis (excluding coagulase-negative staphylococci) |                      |         |                 |                          |
| 3 days before diagnosis (t <sub>-3</sub> )                                      | 17                   | 21      | 0.872           | 0.52 (0.36-0.68)         |
| 2 days before diagnosis (t <sub>-2</sub> )                                      | 15                   | 22      | 0.458           | 0.43 (0.27-0.59)         |
| 1 day before diagnosis (t <sub>-1</sub> )                                       | 21                   | 20      | 0.297           | 0.60 (0.44-0.74)         |
| Combined time points t <sub>-1-(-3)</sub>                                       | 53                   | 63      | 0.046           | 0.61 (0.52-0.70)         |
| a. S. aureus late-onset sepsis                                                  |                      |         |                 |                          |
| 3 days before diagnosis (t <sub>-3</sub> )                                      | 11                   | 12      | 0.347           | 0.55 (0.29-0.81)         |
| 2 days before diagnosis (t <sub>-2</sub> )                                      | 8                    | 13      | 0.788           | 0.60 (0.32-0.88)         |
| 1 day before diagnosis (t <sub>-1</sub> )                                       | 15                   | 11      | 0.856           | 0.52 (0.30-0.73)         |
| Combined time points t <sub>-1-(-3)</sub>                                       | 34                   | 35      | 0.045           | 0.62 (0.48-0.75)         |
| 3. Coagulase-negative staphylococci late-onset sepsis                           |                      |         |                 |                          |
| 3 days before diagnosis (t <sub>-3</sub> )                                      | 39                   | 36      | 0.895           | 0.49 (0.38-0.60)         |
| 2 days before diagnosis (t <sub>-2</sub> )                                      | 41                   | 49      | 0.573           | 0.54 (0.43-0.63)         |
| 1 day before diagnosis (t <sub>-1</sub> )                                       | 43                   | 54      | 0.017           | 0.64 (0.55-0.74)         |
| Combined time points t <sub>-1-(-3)</sub>                                       | 123                  | 139     | 0.0001          | 0.68 (0.62-0.73)         |

Number of samples give an indication on the group sizes of the comparisons. \*AUC ≥0.75. Abbreviations: LOS, late-onset sepsis; ±95% CI, 95% confidence interval; GC-IMS, Gas-chromatography – ion mobility spectrometry.

**Table S3.** Performance characteristics of GC-TOF-MS as analyzed by sparse logistic regression classification.

| Subgroup                                                                        | Number of samples |         | <i>p</i> -value | AUC<br>(± 95% CI)        |
|---------------------------------------------------------------------------------|-------------------|---------|-----------------|--------------------------|
|                                                                                 | Case              | Control |                 |                          |
| All categories of late-onset sepsis                                             |                   |         |                 |                          |
| 3 days before diagnosis (t <sub>3</sub> )                                       | 26                | 27      | 0,69            | 0,55 (0,41-0,69)         |
| 2 days before diagnosis (t <sub>2</sub> )                                       | 26                | 25      | 0,77            | 0,63 (0,49-0,77)         |
| 1 day before diagnosis (t <sub>1</sub> )                                        | 27                | 27      | 0,76            | 0,64 (0,51-0,76)         |
| Combined time points t <sub>1-(-3)</sub>                                        | 79                | 79      | 0,76            | 0,69 (0,62-0,76)         |
| 1. Gram-negative late-onset sepsis                                              |                   |         |                 |                          |
| 3 days before diagnosis (t <sub>3</sub> )                                       | 11                | 13      | 0,89            | 0,73 (0,55-0,89)         |
| 2 days before diagnosis (t <sub>2</sub> )                                       | 16                | 10      | 0,86            | 0,69 (0,48-0,86)         |
| 1 day before diagnosis (t <sub>1</sub> )                                        | 11                | 12      | 0,72            | 0,52 (0,29-0,72)         |
| Combined time points t <sub>1-(-3)</sub>                                        | 38                | 35      | 0,85            | <b>0,77 (0,68-0,85)*</b> |
| 2. Gram-positive late-onset sepsis (excluding coagulase-negative staphylococci) |                   |         |                 |                          |
| 3 days before diagnosis (t <sub>3</sub> )                                       | 6                 | 9       | 0,77            | 0,48 (0,20-0,77)         |
| 2 days before diagnosis (t <sub>2</sub> )                                       | 4                 | 7       | 1,00            | 0,64 (0,29-1,00)         |
| 1 day before diagnosis (t <sub>1</sub> )                                        | 10                | 7       | 0,99            | <b>0,75 (0,50-0,99)*</b> |
| Combined time points t <sub>1-(-3)</sub>                                        | 20                | 23      | 0,86            | 0,74 (0,6-0,86)          |
| 3. Coagulase-negative staphylococci late-onset sepsis                           |                   |         |                 |                          |
| 3 days before diagnosis (t <sub>3</sub> )                                       | 9                 | 5       | 0,89            | 0,52 (0,17-0,89)         |
| 2 days before diagnosis (t <sub>2</sub> )                                       | 9                 | 7       | 0,58            | 0,32 (0,08-0,58)         |
| 1 day before diagnosis (t <sub>1</sub> )                                        | 7                 | 8       | 0,84            | 0,55 (0,27-0,84)         |
| Combined time points t <sub>1-(-3)</sub>                                        | 23                | 22      | 0,81            | 0,68 (0,54-0,81)         |

Number of samples give an indication on the group sizes of the comparisons. \*AUC ≥0.75. Abbreviations: LOS, late-onset sepsis; ±95% CI, 95% confidence interval; GC-TOF-MS, Gas-chromatography – time of flight – mass spectrometry.

**Table S4.** Identified metabolites by GC-TOF-MS.

| Metabolite                                  | CAS-number            | Chemical class                      | Detected in neonatal feces | Common in adult feces | Previous associations with disease                                                           |
|---------------------------------------------|-----------------------|-------------------------------------|----------------------------|-----------------------|----------------------------------------------------------------------------------------------|
| 1-Propene, 2-methyl-(2-Aziridinyethyl)amine | 115-11-1<br>4025-37-0 | Hydrocarbons<br>Nitrogen containing | X [60]                     |                       | ↑ UC remission [54] (in exhaled breath)<br>Associated with active UC [57]                    |
| Acetone                                     | 67-64-1               | Ketones                             | X [60]                     | X<br>[35,49,50,57,60] |                                                                                              |
| Cyclopentane                                | 287-92-3              | Cycloalkanes                        |                            |                       | ↓ UC remission [49]<br>↑ occurrence in CD infection [35]                                     |
| Dimethyl ether                              | 115-10-6              | Ethers                              |                            | X [50,51]             |                                                                                              |
| Furan, 3-methyl-                            | 930-27-8              | Furans                              |                            | X [35]                | ↓ in UC vs CrD and healthy patients [49]<br>↓ occurrence in UC and CD & CJ infections [35]   |
| Isopropyl Alcohol                           | 67-63-0               | Alcohols                            | X [60]                     | X [35]                | Associated with active IBD [52,57]<br>↑ in colorectal cancer [55]<br>↓ occurrence in UC [49] |
| Methylene chloride                          | 75-09-2               | Halomethanes                        |                            | X [51]                | ↓ occurrence in UC and CD & CJ infections [35]                                               |
| Propanal, 2-methyl-Ethyl Acetate            | 78-84-2<br>141-78-6   | Aldehydes<br>Esters                 | X [60]<br>X [60]           | X [35]                | Associated with CrD [49]<br>↑ in NAFLD [53]                                                  |
| Heptanal                                    | 111-71-7              | Aldehydes                           | X [60]                     | X [35,57]             | Associated with active CrD [52,57]<br>↑ occurrence in CJ infections [35]                     |
| Acetic acid, 2-(methylaminoethyl) ester     | n.a.                  | Esters                              |                            |                       |                                                                                              |
| Propanoic acid, 2-hydroxy-, ethyl ester     | 97-64-3               | Esters                              |                            |                       |                                                                                              |
| Propene                                     | 115-07-1              | Alkenes                             |                            |                       |                                                                                              |
| 2,3-Butanedione                             | 431-03-8              | Ketones                             | X [60]                     | X [35,53,57]          |                                                                                              |
| Acetic acid                                 | 64-19-7               | Acids                               | X [60,61]                  | X [57]                | ↑ in control vs LOS infants [61]<br>↓ active UC [56] (in exhaled breath)                     |
| Benzene                                     | 71-43-2               | Hydrocarbons                        |                            |                       | ↓ UC remission [49]<br>↑ occurrence UC [35]                                                  |
| Butanal, 3-methyl-                          | 590-86-3              | Aldehydes                           | X [60]                     | X [35,52,53]          |                                                                                              |
| Butanoic acid, 3-methyl-                    | 503-74-2              | Fatty acids                         |                            | X [35,57]             |                                                                                              |
| Pentane, 2,2,4,4-tetramethyl-               | 1070-87-7             | Alkanes                             |                            |                       |                                                                                              |
| Furan, 2-ethyl-                             | 3208-16-0             | Furans                              | X [60]                     |                       |                                                                                              |

The discriminatory metabolites are presented with their CAS-number and chemical class. This table shows whether the discriminatory metabolite has previously been detected in the feces of premature infants or adults. In addition, the relation of the metabolite to other diseases is depicted. X: The VOC is previously detected in neonatal feces or considered as common in adult feces. Abbreviations: GC-TOF-MS, gas chromatography – time of flight/mass spectrometry; UC, ulcerative colitis; CD, *Clostridium difficile*; CrD, Crohn's disease; CJ, *Campylobacter jejuni*; LOS, late-onset

sepsis; NAFLD, non-alcoholic fatty liver disease. n.a., not available. References are found in main text.

## Supplementary Figures

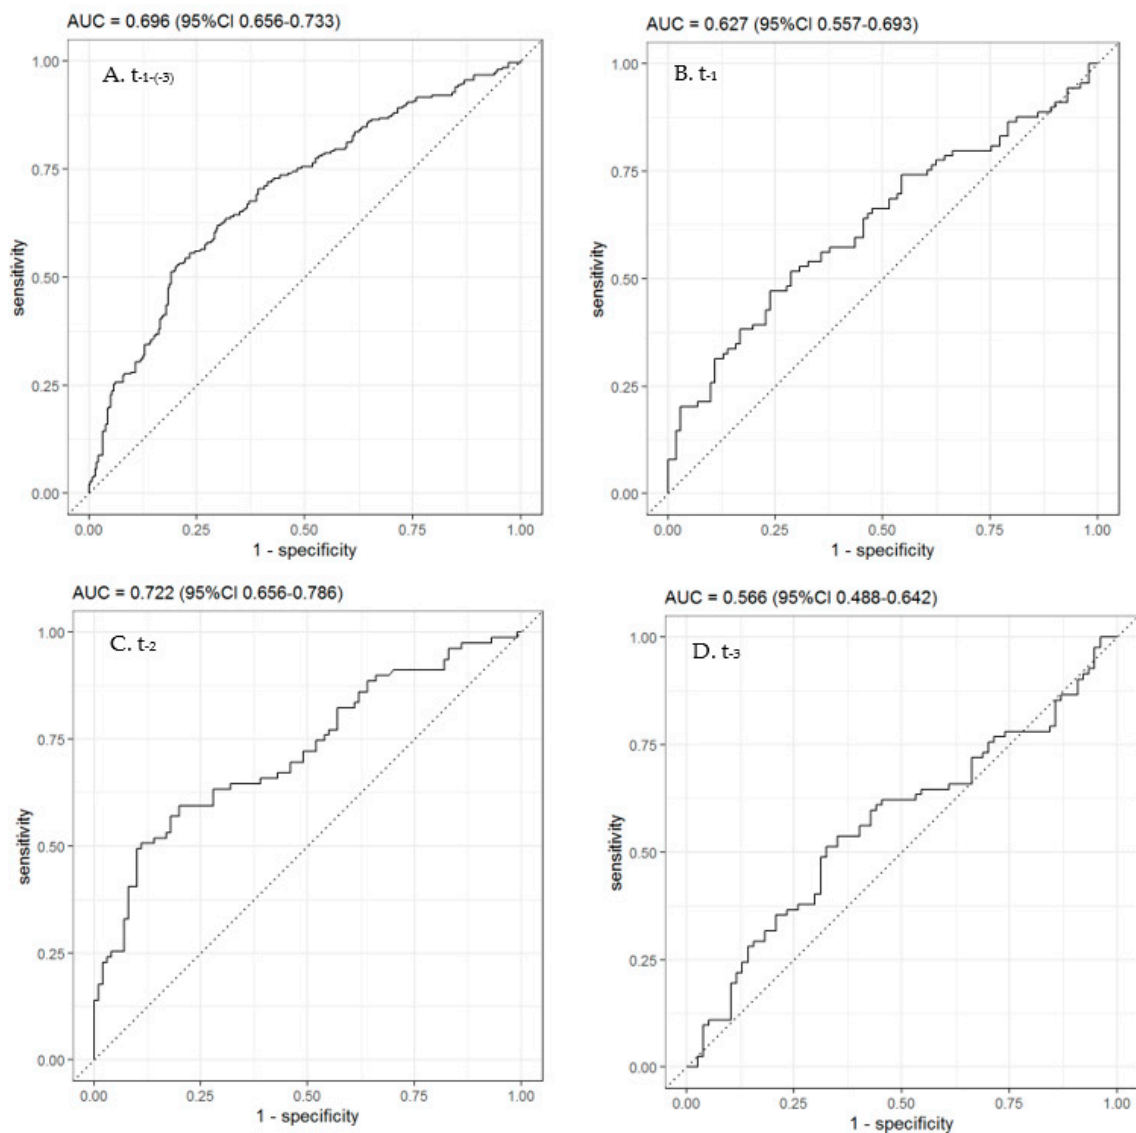

**Figure S1. ROC curves for all LOS infants by GC-IMS.** In this figure, the ROC curves with their corresponding AUC and 95% CI, are presented for all LOS infants as generated by sparse logistic regression algorithm. (A) All time points combined ( $t_{-1(-3)}$ ). (B) 1 day prior to sepsis ( $t_{-1}$ ). (C) 2 days prior to sepsis ( $t_{-2}$ ). (D) 3 days prior to sepsis ( $t_{-3}$ ). Abbreviations: LOS, late-onset sepsis; ROC, receiver operating characteristic; AUC, area under curve; 95% confidential intervals, 95% CI; GC-IMS, Gas-chromatography – ion mobility spectrometry.

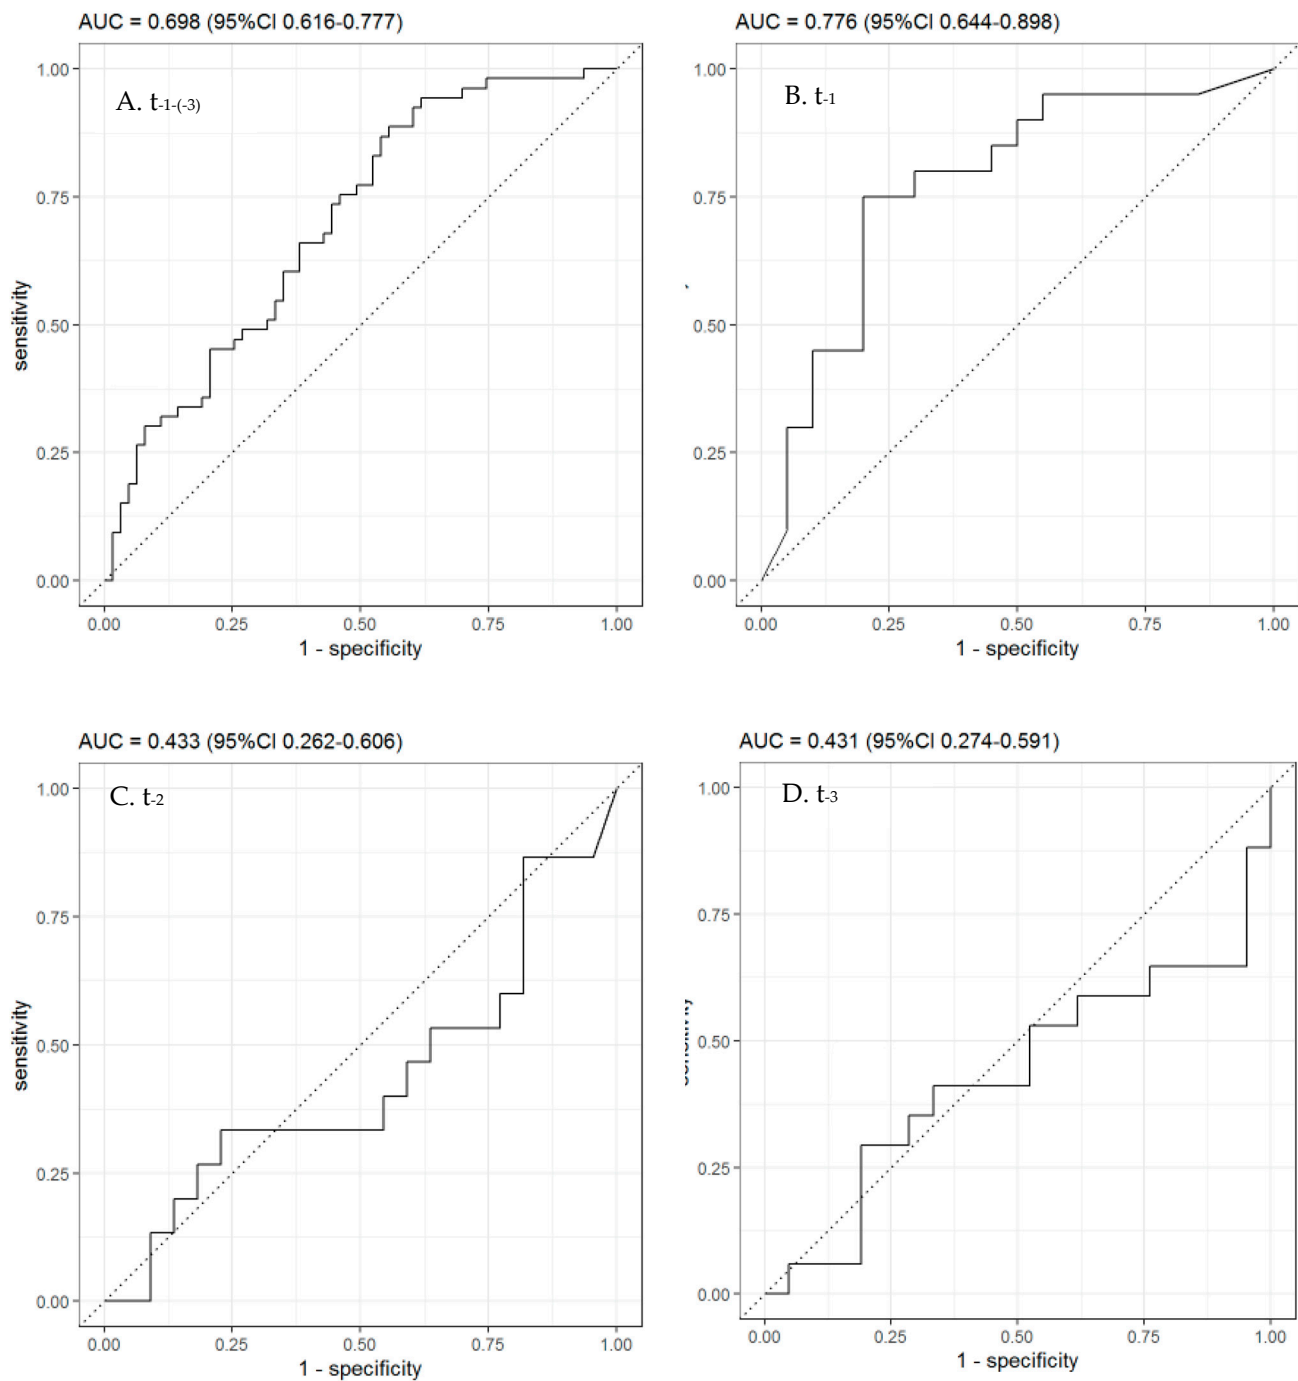

**Figure S2. ROC curves for gram-positive LOS infants by GC-IMS.** In this figure, the ROC curves with their corresponding AUC and 95% CI, are presented for gram-positive LOS infants as generated by sparse logistic regression algorithm. A) All time points combined ( $t_{-1-(-3)}$ ). B) 1 day prior to sepsis ( $t_{-1}$ ). C) 2 days prior to sepsis ( $t_{-2}$ ). D) 3 days prior to sepsis ( $t_{-3}$ ). Abbreviations: LOS, late-onset sepsis; ROC, receiver operating characteristic; AUC, area under curve; 95% CI, 95% confidential intervals; GC-IMS, Gas-chromatography – ion mobility spectrometry.

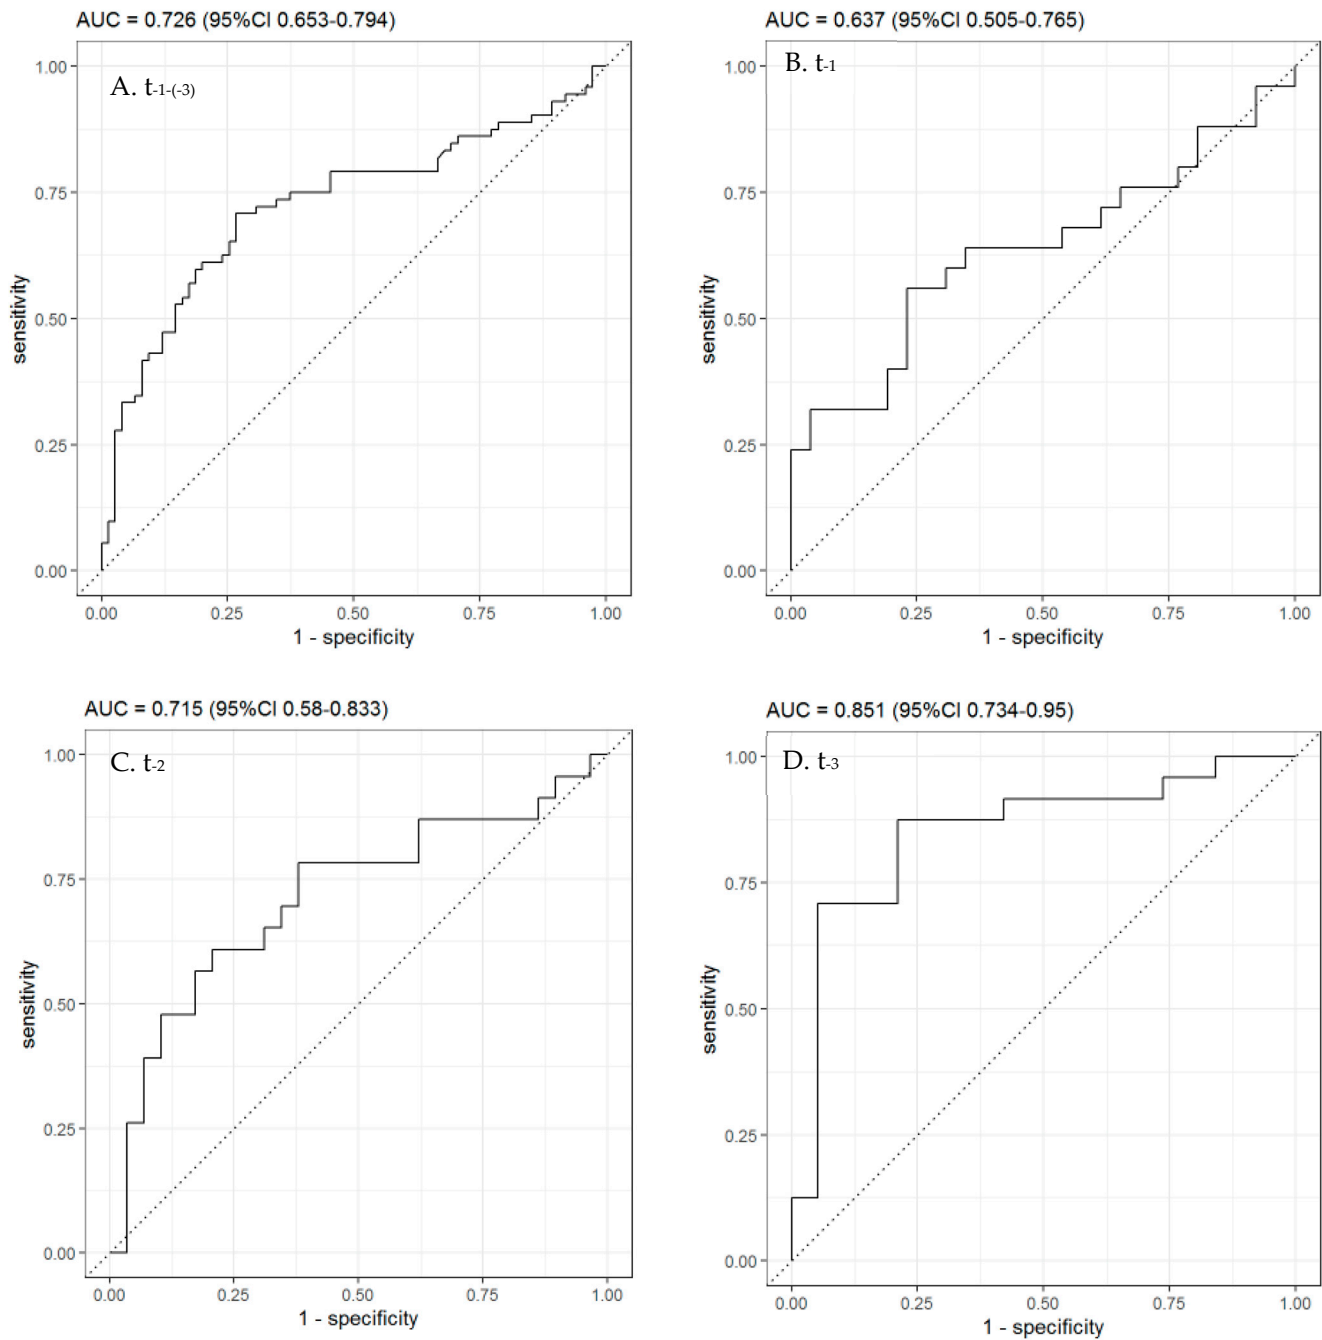

**Figure S3. ROC curves for gram-negative LOS infants by GC-IMS.** In this figure, the ROC curves with their corresponding AUC and 95% CI, are presented for gram-negative LOS infants as generated by sparse logistic regression algorithm. A) All time points combined ( $t_{-1-(-3)}$ ). B) 1 day prior to sepsis ( $t_{-1}$ ). C) 2 days prior to sepsis ( $t_{-2}$ ). D) 3 days prior to sepsis ( $t_{-3}$ ). Abbreviations: LOS, late-onset sepsis; ROC, receiver operating characteristic; AUC, area under curve; 95% CI, 95% confidential intervals; GC-IMS, Gas-chromatography – ion mobility spectrometry.

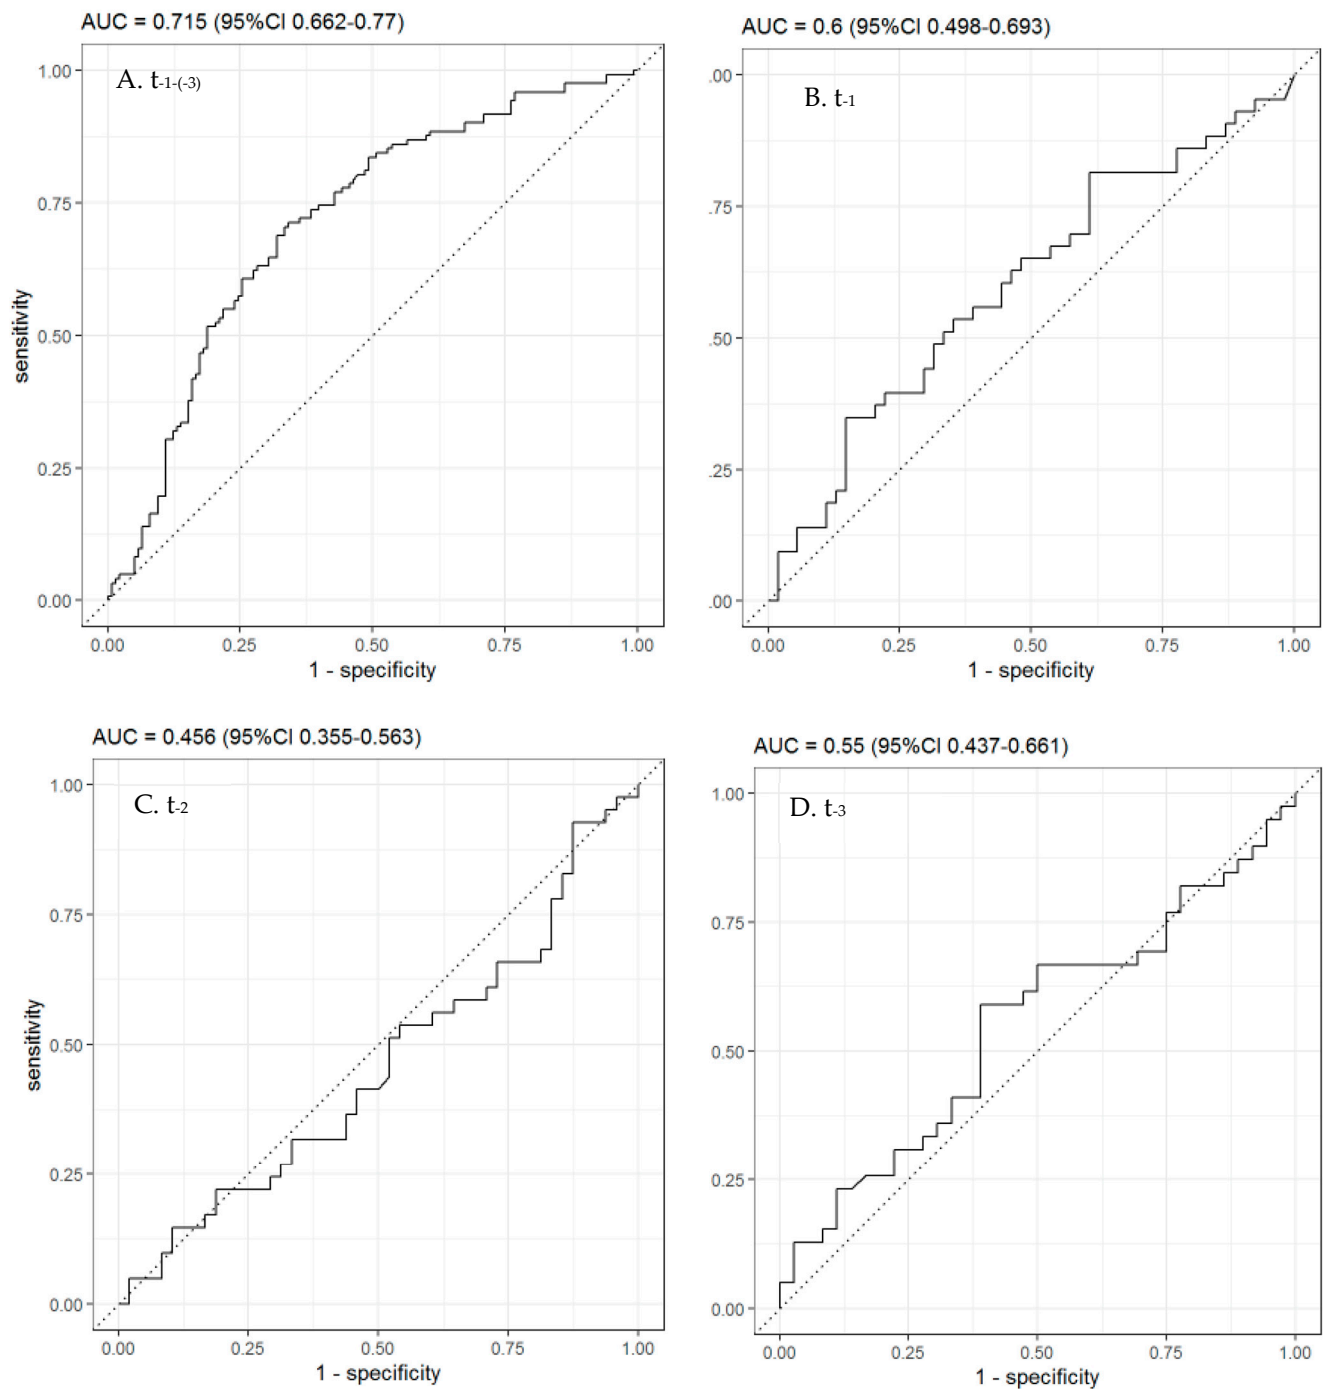

**Figure S4. ROC curves for coagulase negative *staphylococcus* LOS infants by GC-IMS.** In this figure, the ROC curves with their corresponding AUC and 95% CI, are presented for coagulase negative *staphylococcus* LOS infants as generated by sparse logistic regression algorithm. A) All time points combined ( $t_{-1(-3)}$ ). B) 1 day prior to sepsis ( $t_{-1}$ ). C) 2 days prior to sepsis ( $t_{-2}$ ). D) 3 days prior to sepsis ( $t_{-3}$ ). Abbreviations: LOS, late-onset sepsis; ROC, receiver operating characteristic; AUC, area under curve; 95% confidential intervals, 95% CI; GC-IMS, Gas-chromatography – ion mobility spectrometry.

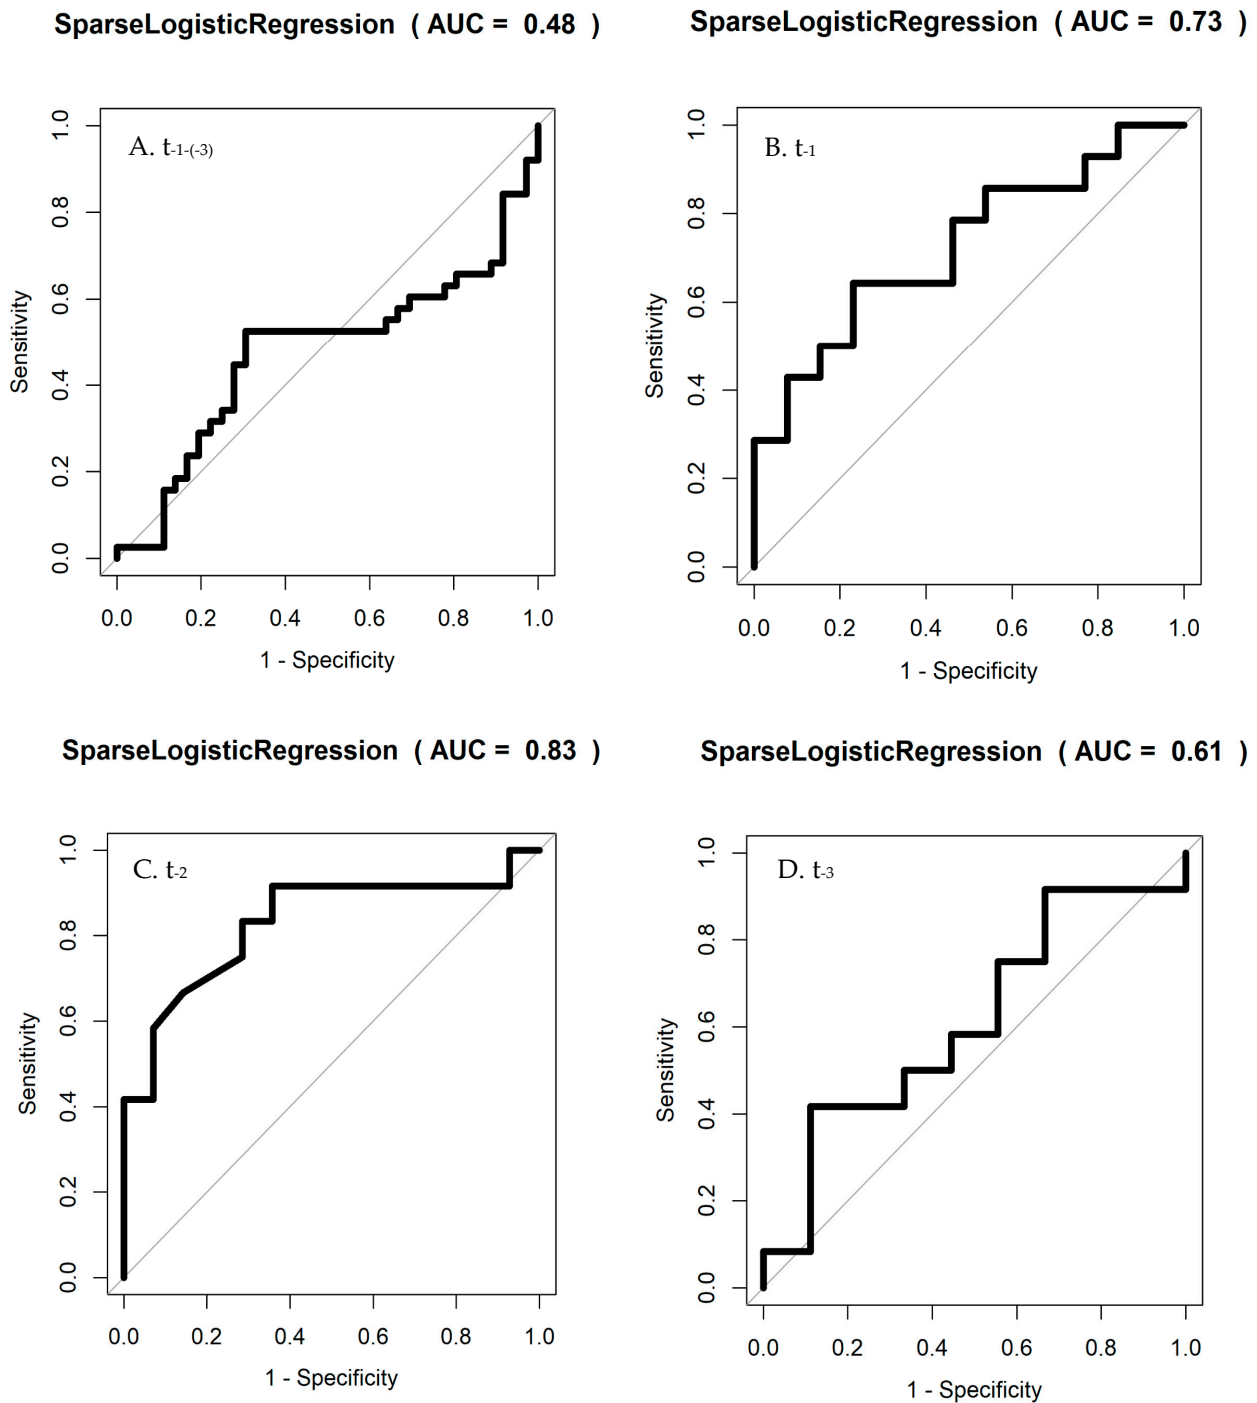

**Figure S5. ROC curves for *E. coli* LOS infants by GC-IMS.** In this figure, the ROC curves with their corresponding AUC and 95% CI, are presented for *E. coli* LOS infants as generated by sparse logistic regression algorithm. A) All time points combined ( $t_{-1-(-3)}$ ). B) 1 day prior to sepsis ( $t_{-1}$ ). C) 2 days prior to sepsis ( $t_{-2}$ ). D) 3 days prior to sepsis ( $t_{-3}$ ). Abbreviations: LOS, late-onset sepsis; ROC, receiver operating characteristic; AUC, area under curve; 95% CI, 95% confidential intervals; GC-IMS, Gas-chromatography – ion mobility spectrometry.

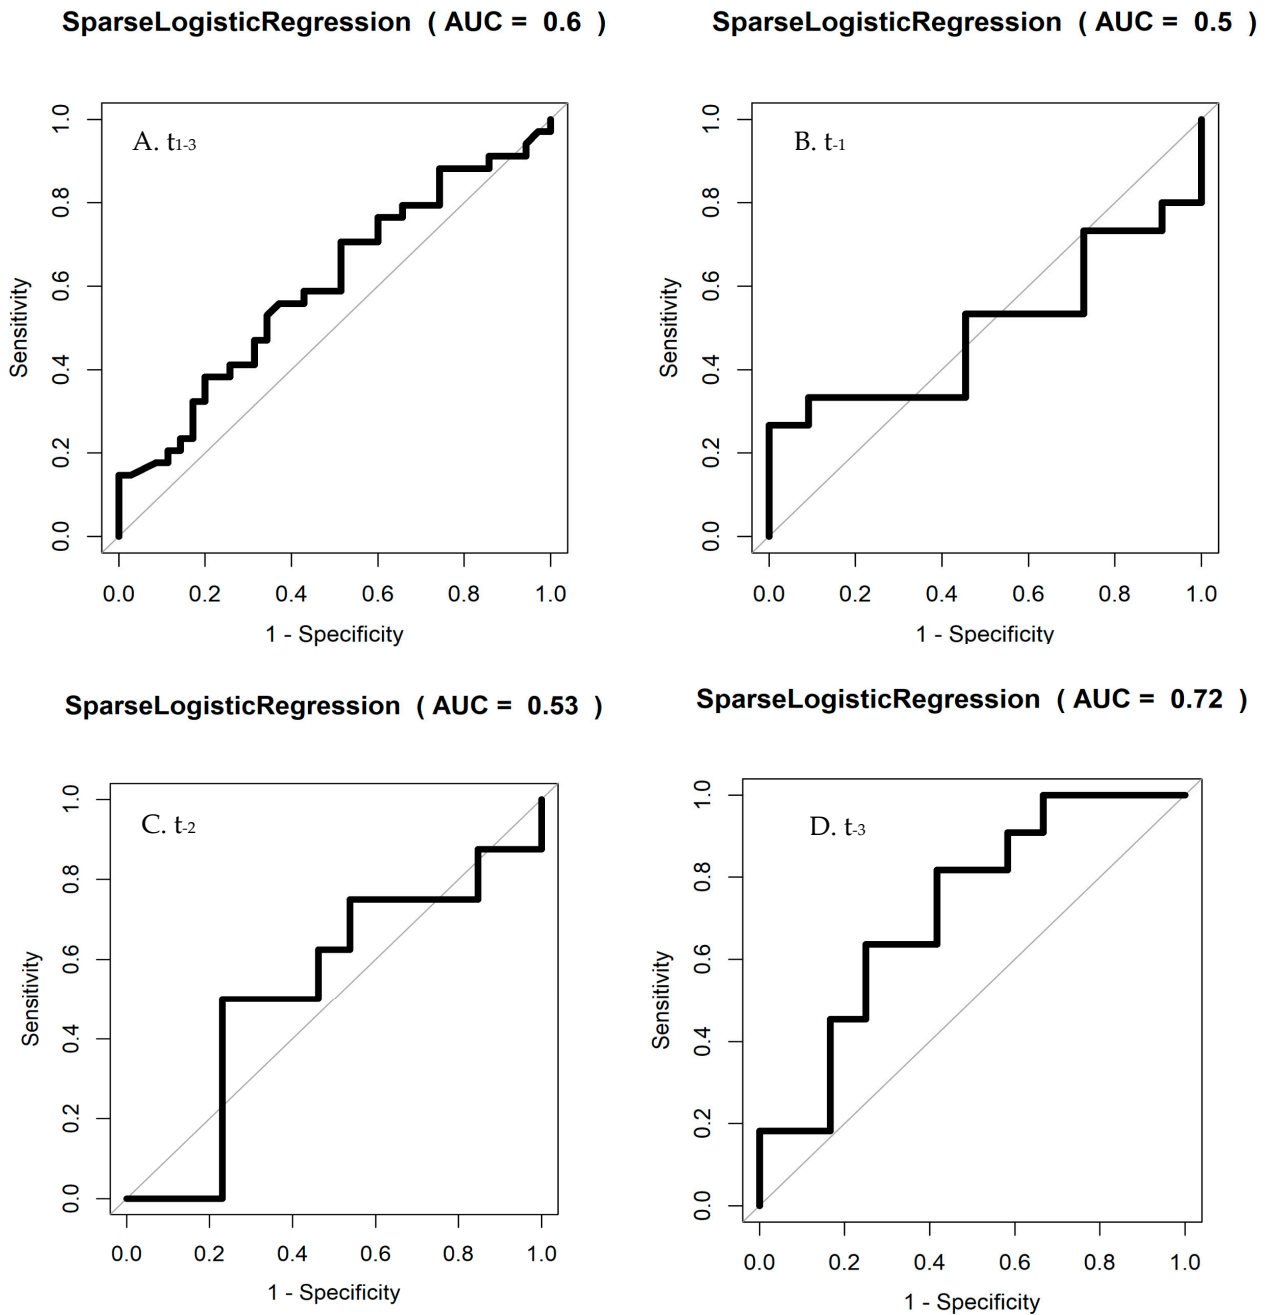

**Figure S6. ROC curves for *S. aureus* LOS infants by GC-IMS.** In this figure, the ROC curves with their corresponding AUC and 95% CI, are presented for *S. aureus* LOS infants as generated by sparse logistic regression algorithm. A) All time points combined ( $t_{1-(-3)}$ ). B) 1 day prior to sepsis ( $t_{-1}$ ). C) 2 days prior to sepsis ( $t_{-2}$ ). D) 3 days prior to sepsis ( $t_{-3}$ ). Abbreviations: LOS, late-onset sepsis; ROC, receiver operating characteristic; AUC, area under curve; 95% confidential intervals, 95% CI; GC-IMS, Gas-chromatography – ion mobility spectrometry.

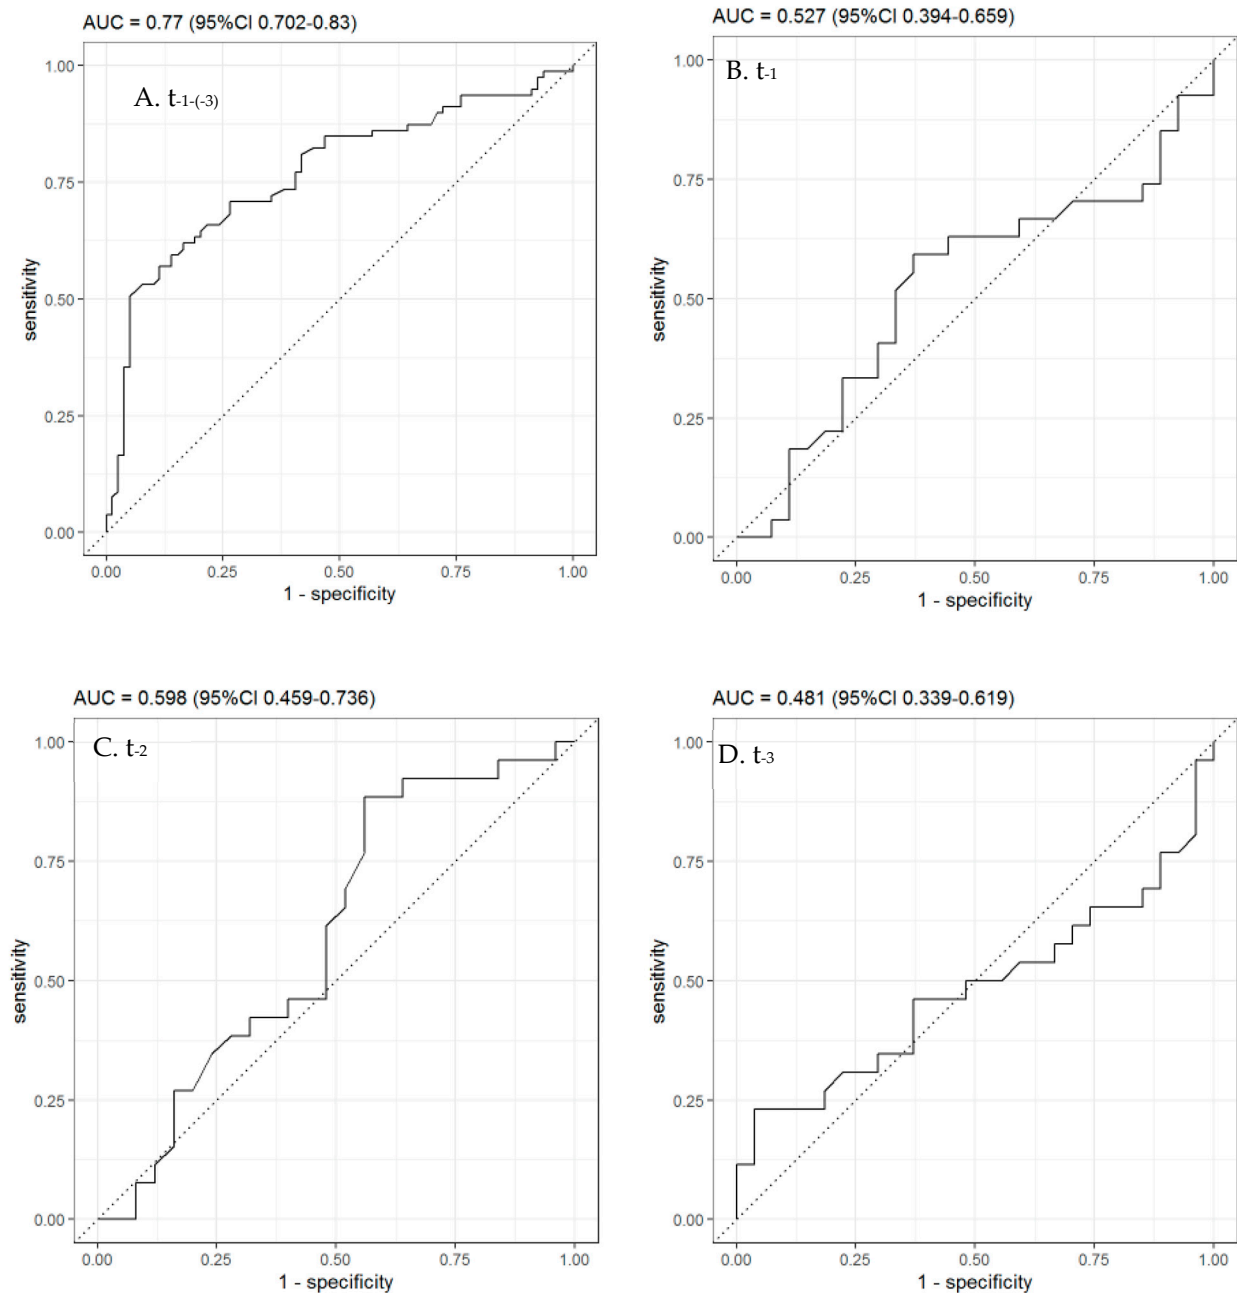

**Figure S7. ROC curves for all LOS infants by GC-TOF-MS.** In this figure, the ROC curves generated by the random forest classification algorithm are presented with corresponding area under the curves (AUC) and 95% confidential intervals (95% CI). A) All time points combined ( $t_{-1(-3)}$ ). B) 1 day prior to sepsis ( $t_{-1}$ ). C) 2 days prior to sepsis ( $t_{-2}$ ). D) 3 days prior to sepsis ( $t_{-3}$ ). Abbreviations: LOS, late-onset sepsis; ROC, receiver operating characteristic; GC-TOF-MS, Gas-chromatography – time of flight – mass spectrometry.

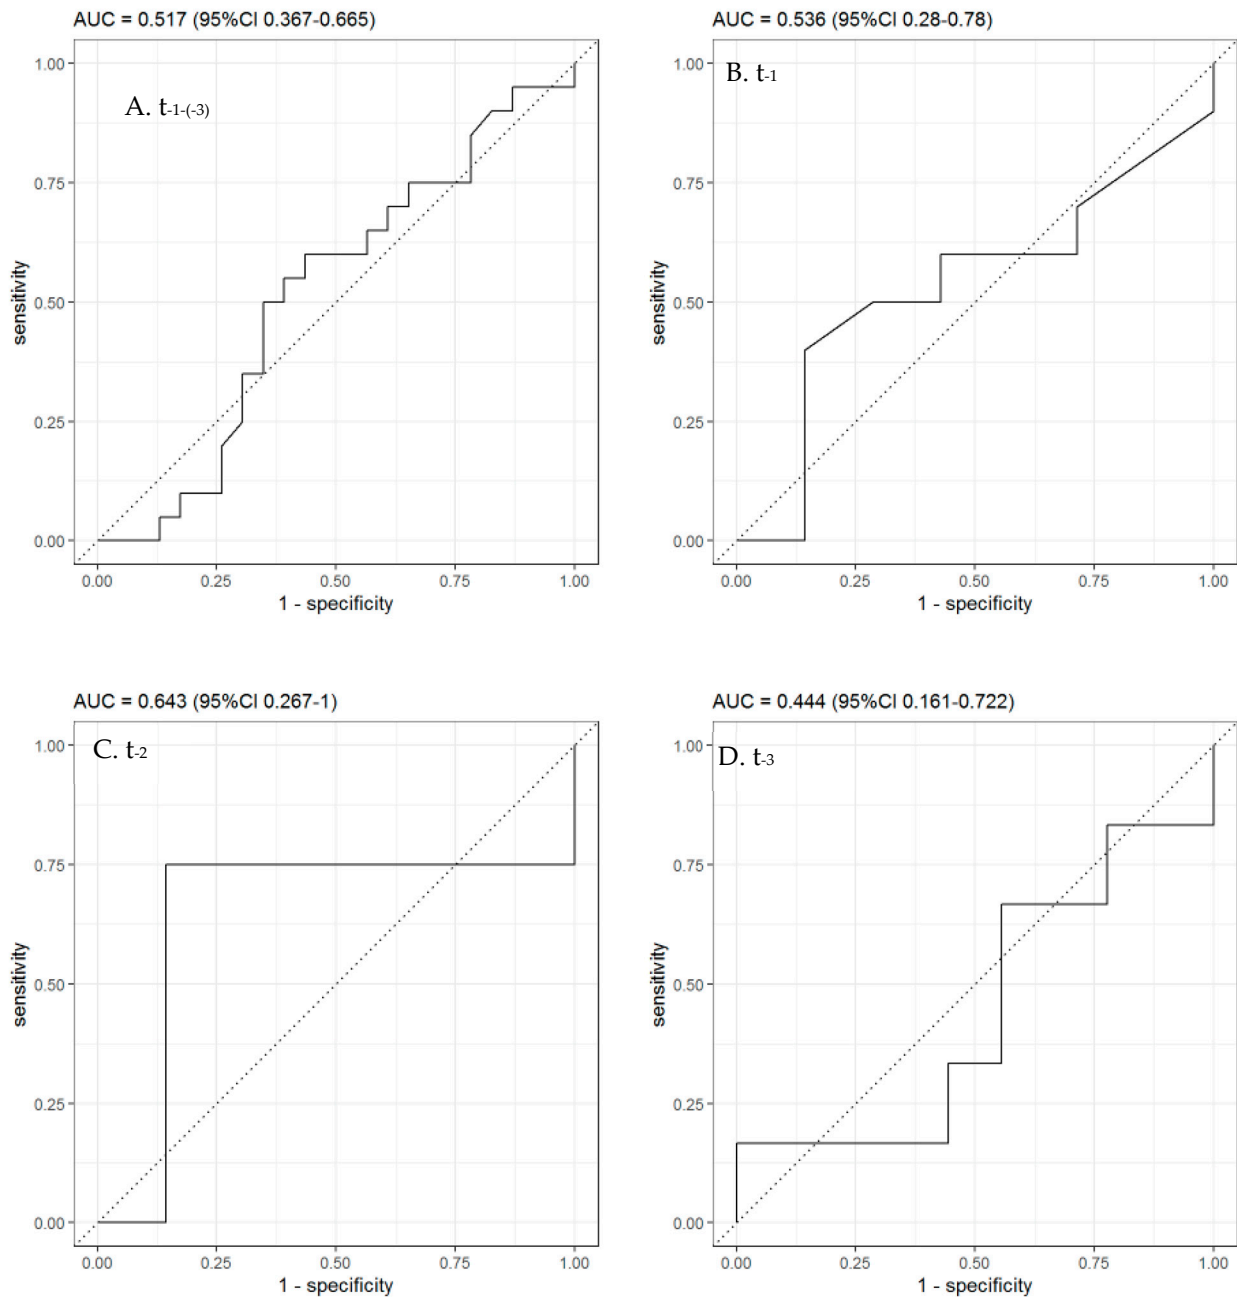

**Figure S8. ROC curves for gram-positive LOS infants by GC-TOF-MS.** In this figure, the ROC curves generated by the random forest classification algorithm are presented with corresponding area under the curves (AUC) and 95% confidential intervals (95% CI). A) All time points combined ( $t_{1-(-3)}$ ). B) 1 day prior to sepsis ( $t_1$ ). C) 2 days prior to sepsis ( $t_2$ ). D) 3 days prior to sepsis ( $t_3$ ). Abbreviations: LOS, late-onset sepsis; ROC, receiver operating characteristic; GC-TOF-MS, Gas-chromatography – time of flight – mass spectrometry.

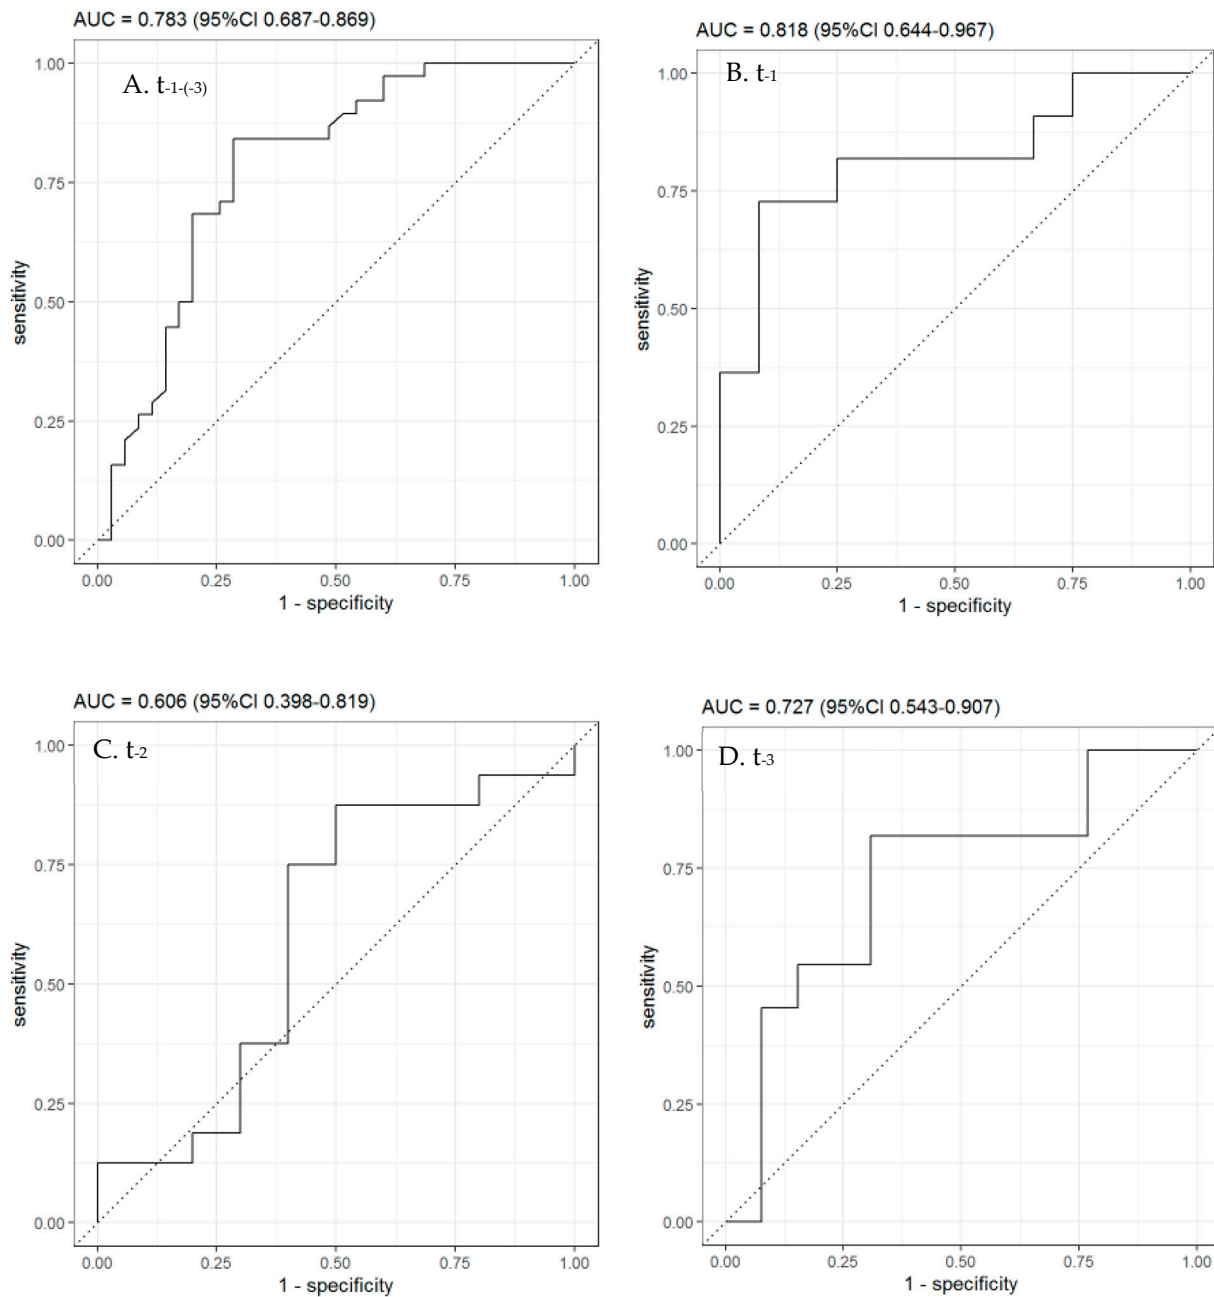

**Figure S9. ROC curves for gram-negative LOS infants by GC-TOF-MS.** In this figure, the ROC curves generated by the random forest classification algorithm are presented with corresponding area under the curves (AUC) and 95% confidential intervals (95% CI). A) All time points combined ( $t_{-1(-3)}$ ). B) 1 day prior to sepsis ( $t_{-1}$ ). C) 2 days prior to sepsis ( $t_{-2}$ ). D) 3 days prior to sepsis ( $t_{-3}$ ). Abbreviations: LOS, late-onset sepsis; ROC, receiver operating characteristic; GC-TOF-MS, Gas-chromatography – time of flight – mass spectrometry.

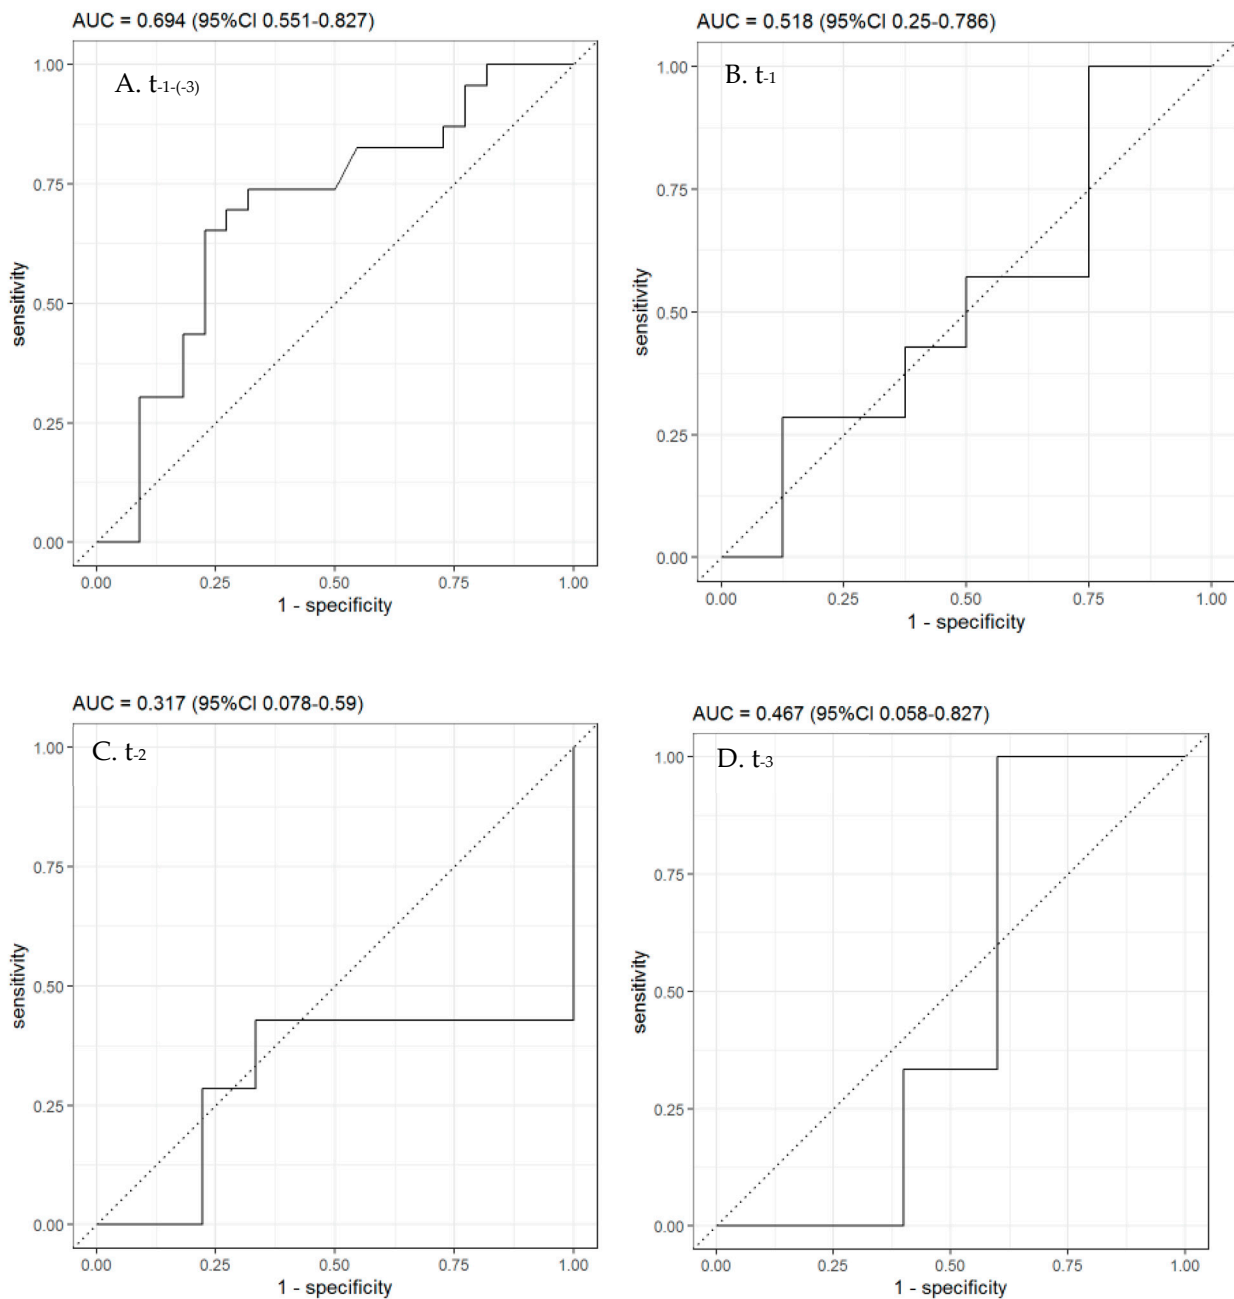

**Figure S10. ROC curves for coagulase negative *staphylococcus* LOS infants by GC-TOF-MS.** In this figure, the ROC curves generated by the random forest classification algorithm are presented with corresponding area under the curves (AUC) and 95% confidential intervals (95% CI). A) All time points combined ( $t_{-1-(-3)}$ ). B) 1 day prior to sepsis ( $t_{-1}$ ). C) 2 days prior to sepsis ( $t_{-2}$ ). D) 3 days prior to sepsis ( $t_{-3}$ ). Abbreviations: LOS, late-onset sepsis; ROC, receiver operating characteristic; GC-TOF-MS, Gas-chromatography – time of flight – mass spectrometry.
